# Supplementary material
Source: PubMed Central journal article supplement (PMC2841877)
Supplement: 1000798107_pnas.201000798SI.pdf [file 1000798107_pnas.201000798SI.pdf]

# Supporting Information

Martinez and Kolodner 10.1073/pnas.1000798107

Table S1. Genetic properties of the *msh6-R1024C* mutation

| Strain no. | Genotype             | Mutation rate              |                               |                            |
|------------|----------------------|----------------------------|-------------------------------|----------------------------|
|            |                      | Thr <sup>+</sup>           | Lys <sup>+</sup>              | Can <sup>r</sup>           |
| RDKY3590   | <i>Wild-type</i>     | $2.01 \times 10^{-9}$ (1)  | $1.55 \times 10^{-8}$ (1)     | $1.13 \times 10^{-7}$ (1)  |
| RDKY3684   | <i>msh6</i> $\Delta$ | $3.55 \times 10^{-8}$ (18) | $1.69 \times 10^{-6}$ (109)   | $1.59 \times 10^{-6}$ (14) |
| RDKY7113   | <i>msh6-R1024C</i>   | $9.82 \times 10^{-8}$ (53) | $1.87 \times 10^{-5}$ (1,208) | $1.27 \times 10^{-6}$ (12) |

The number in parentheses is the fold-increase in mutation rate relative to the wild-type strain RDKY3590. Note that the increased rate of reversion of the *hom3-10* (Thr<sup>+</sup>) and *lys2-10A* frameshift mutations caused by the *msh6-R1024C* mutation relative to that caused by the *msh6* $\Delta$  mutation is indicative of a dominant *msh6* mutation as described in ref. 31.
